# Supplementary material for: Resveratrol Attenuates Diquat-Induced Oxidative Stress by Regulating Gut Microbiota and Metabolome Characteristics in Piglets
Source: PubMed Central journal article supplement (PMC8312259; doi:10.3389/fmicb.2021.695155), 2021-07-12
Supplement: Data_Sheet_1.pdf [file Data_Sheet_1.pdf]

## Supplementary information:

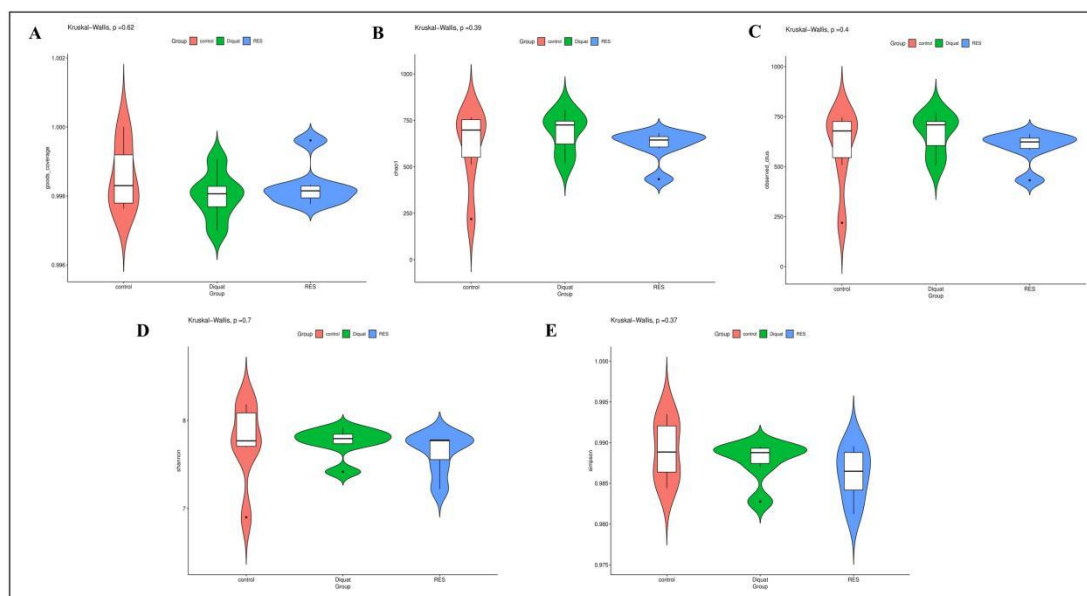

**Supplementary Figure 1:** The boxplot of differences on bacterial community diversity and richness. A.Good Coverages index; B.Chao1 index; C.Observed Species index; D.Shannon index; E.Simpson index. \*Means significant difference ( $P < 0.05$ ) among different groups, none \* Means no significant difference.

**Supplementary Table 1.** Statistics of identified metabolites

| Mode | All feature | All annotated | MS2  | HMDB  | KEGG  |
|------|-------------|---------------|------|-------|-------|
| POS  | 19557       | 13946         | 1074 | 12466 | 11052 |
| NEG  | 13552       | 8670          | 768  | 7447  | 6524  |

**Supplementary Table 2. Statistics of identified metabolites:** Differences in metabolites in the colon of RES and control groups in positive ion (A) and negative ion model (B), respectively.

| POS--MS2 Metabolite (A)            | VIP         | P-value     | Regulated | Ratio       |
|------------------------------------|-------------|-------------|-----------|-------------|
| Indole                             | 2.515138987 | 0.136347769 | up        | 2.636600633 |
| 1-(1-Pyrrolidinyl)-2-propanone     | 2.049794182 | 0.337636375 | up        | 2.790697361 |
| Isoquinoline                       | 1.922405271 | 0.162317817 | up        | 2.145815594 |
| 5-Hydroxyindole                    | 1.756415842 | 0.347919252 | up        | 2.214329193 |
| 2-Butyl-3-methylpyrazine           | 2.332095133 | 0.058806016 | up        | 2.850727335 |
| 5-Aminopentanoic acid              | 1.857362511 | 0.365163407 | up        | 3.034063772 |
| 5-Acetamidovalerate                | 2.065848629 | 0.264093995 | up        | 2.22970033  |
| 2-Indolecarboxylic acid            | 2.101072896 | 0.38755169  | up        | 3.378040118 |
| Tryptophanol                       | 1.908662851 | 0.136347769 | up        | 2.128452066 |
| 4,5-Dihydro-1-benzoxepin-3(2H)-one | 1.836235064 | 0.107728865 | up        | 2.162562719 |
| DL-.beta.-Homophenylalanine        | 2.285467832 | 0.244617189 | up        | 5.160112743 |
| Glycyl-L-norleucine                | 1.941472427 | 0.127158985 | up        | 2.231378527 |
| 1-hydroxyhexanoylglycine           | 2.224239756 | 0.227641704 | up        | 3.210751572 |
| Kynurenic acid                     | 3.0441392   | 0.135479455 | up        | 7.381240572 |

|                                                                                   |             |             |      |             |
|-----------------------------------------------------------------------------------|-------------|-------------|------|-------------|
| Kynurenic acid                                                                    | 3.313537279 | 0.090082694 | up   | 6.701602931 |
| Atractylenolide III                                                               | 2.579488881 | 0.312165735 | up   | 3.092875213 |
| Daidzein                                                                          | 2.019804919 | 0.162858416 | up   | 2.387061339 |
| Isoleptospermane                                                                  | 2.795293144 | 0.234890317 | up   | 5.275104197 |
| Met-His                                                                           | 2.805086492 | 0.022199065 | up   | 3.762887256 |
| Androstadienone                                                                   | 2.376750397 | 0.172340217 | up   | 3.146357861 |
| trans-Hydroxyperhexiline                                                          | 4.087327387 | 0.00260258  | up   | 12.80328772 |
| Palmitoyl ethanolamide                                                            | 2.141798238 | 0.235523138 | up   | 2.466870361 |
| Palmitoyl ethanolamide                                                            | 2.157240064 | 0.311203531 | up   | 2.665154024 |
| 11,14,17-Eicosatrienoic acid, (Z,Z,Z)-                                            | 2.091177516 | 0.356305714 | up   | 4.081678928 |
| 8Z,14Z-Eicosadienoic acid                                                         | 2.031919271 | 0.136347769 | up   | 2.222958008 |
| 13-HDoHE                                                                          | 2.168647506 | 0.250009856 | up   | 3.053217688 |
| 13-HDoHE                                                                          | 2.155803773 | 0.147948235 | up   | 3.073229311 |
| 12-Ketodeoxycholic acid                                                           | 1.841254011 | 0.182621121 | up   | 2.01567866  |
| Retinamide, N-(4-hydroxyphenyl)-                                                  | 3.037506482 | 0.189372952 | up   | 5.339494009 |
| Soyasaponin Bb                                                                    | 1.930789614 | 0.322842216 | up   | 2.615244916 |
| Pilocarpine                                                                       | 2.97351591  | 0.143012437 | up   | 5.887538897 |
| Phenylalanyl-Glycine                                                              | 3.432903141 | 0.163425374 | up   | 6.202350224 |
| alpha,beta-Dihydroresveratrol                                                     | 1.623230015 | 0.368783257 | up   | 2.320029751 |
| Isonicotinic acid                                                                 | 1.543451438 | 0.353674458 | down | 0.498060133 |
| Adenine                                                                           | 2.331933287 | 0.058806016 | down | 0.396017255 |
| 9-Azabicyclo[3.3.1]nonan-3-one                                                    | 2.789999989 | 0.027076093 | down | 0.254212573 |
| Tranexamic Acid                                                                   | 2.833735045 | 0.060258522 | down | 0.233483523 |
| 3-Methyldioxyindole                                                               | 2.301590211 | 0.190932992 | down | 0.342671009 |
| 3-Methyldioxyindole                                                               | 2.154451996 | 0.166235858 | down | 0.405037182 |
| 3-Methyldioxyindole                                                               | 2.138986272 | 0.075750403 | down | 0.430224442 |
| Triethyl phosphate                                                                | 1.746680927 | 0.349027125 | down | 0.455570353 |
| Ethyl 4-phenylbutanoate                                                           | 1.852739764 | 0.097876238 | down | 0.494488076 |
| Deoxyadenosine                                                                    | 2.22005164  | 0.068136102 | down | 0.405969233 |
| 3-Furancarboxylic acid,<br>tetrahydro-4-methylene-2-octyl-5-oxo-,<br>(2R,3S)-rel- | 2.658775756 | 0.222202915 | down | 0.37843916  |
| Testosterone decanoate                                                            | 1.58111437  | 0.347618155 | down | 0.474820752 |

| NEG--MS2 Metabolite (B)            | VIP         | P-value     | Regulated | Ratio       |
|------------------------------------|-------------|-------------|-----------|-------------|
| Dimethylmalonic acid               | 1.925022212 | 0.178885707 | up        | 2.580701953 |
| Glutaric acid                      | 2.451146682 | 0.08212352  | up        | 4.047587587 |
| 4-Hydroxyquinoline                 | 2.820219337 | 0.06574483  | up        | 6.978537883 |
| 4-Hydroxyquinoline                 | 3.166824267 | 0.073818855 | up        | 8.734620655 |
| N-Acetylvaline                     | 1.745876872 | 0.199628651 | up        | 2.144477629 |
| N-Acetylvaline                     | 1.972659261 | 0.194404598 | up        | 2.368727556 |
| 4-Acetyl-2(3H)-<br>5-benzoxazolone | 1.672276912 | 0.274251368 | up        | 2.463238098 |
| Kynurenic acid                     | 3.024930558 | 0.08559284  | up        | 12.16821639 |

|                                                         |             |             |      |             |
|---------------------------------------------------------|-------------|-------------|------|-------------|
| 8-Hydroxyquinoline-5-<br>9-carboxylic acid              | 3.215460191 | 0.08559284  | up   | 9.336482646 |
| 5-Hydroxyindole-3-acetic acid                           | 2.251042041 | 0.19797187  | up   | 4.407572249 |
| Xanthurenic acid                                        | 1.775982429 | 0.18793265  | up   | 2.59930699  |
| 4-(2-Aminophenyl)-2,<br>5-4-dioxobutanoic acid          | 2.531123573 | 0.259463329 | up   | 6.205121614 |
| Gly-Phe                                                 | 2.289015856 | 0.058150153 | up   | 3.313809859 |
| 4-Acetyl-2(3H)-<br>benzoxazolone                        | 2.283385326 | 0.316206507 | up   | 7.038126965 |
| Uridine                                                 | 1.383799811 | 0.315804374 | up   | 2.00599745  |
| 3-Hydroxydodecanedioic acid                             | 2.015221951 | 0.040948116 | up   | 2.313266972 |
| Daidzein                                                | 1.888004287 | 0.217108947 | up   | 3.296475573 |
| 6-Hydroxypentadecanedioic acid                          | 1.533609172 | 0.267545635 | up   | 2.328482691 |
| Uridine                                                 | 1.885601186 | 0.244965678 | up   | 3.215158334 |
| 13-OxoODE                                               | 1.466409738 | 0.318274933 | up   | 2.146987339 |
| Alpha-dimorphenolic acid                                | 2.834818198 | 0.062701777 | up   | 6.81964333  |
| Cis-8,11,14,17-Eicosatetraenoic acid                    | 1.928855745 | 0.123888323 | up   | 2.506581748 |
| Verimol A                                               | 2.367119739 | 0.083628057 | up   | 3.510700625 |
| Corchorifatty acid F                                    | 1.977687389 | 0.286716174 | up   | 4.929243243 |
| Docosahexaenoic acid                                    | 1.946852931 | 0.091542933 | up   | 2.661028037 |
| Aflatoxin B1 dialcohol                                  | 3.057374056 | 0.1714814   | up   | 5.661403685 |
| Aflatoxin B1 dialcohol                                  | 2.360127935 | 0.223358592 | up   | 3.210500647 |
| 2-Methyl-5-(8,11-pentadecadienyl)<br>3--1,3-benzenediol | 2.153136676 | 0.125328556 | up   | 3.368550093 |
| (9S,10S)-10-hydroxy-9-<br>(phosphonoxy)octadecanoate    | 1.533764618 | 0.125142619 | up   | 2.021235305 |
| 1b,3a,12a-Trihydroxy-<br>5b-cholanoic acid              | 1.93722189  | 0.219909015 | up   | 2.692677663 |
| 1b,3a,12a-Trihydroxy-<br>5b-cholanoic acid              | 1.973164332 | 0.222288591 | up   | 2.850457436 |
| FAHFA 27:4; FAHFA(3:0/24:4)                             | 2.202963513 | 0.261566263 | up   | 4.082496308 |
| 1b,3a,12a-Trihydroxy-<br>5b-cholanoic acid              | 2.338503669 | 0.212398086 | up   | 3.314502688 |
| 13'-Carboxy-alpha-<br>tocotrienol                       | 2.460610506 | 0.169378125 | up   | 5.391969309 |
| 3a,7b,12a-<br>Trihydroxyoxocholanyl-Glycine             | 2.339376625 | 0.165912638 | up   | 5.521754717 |
| Echinocystic acid-<br>3-O-glucoside                     | 2.267264167 | 0.080315563 | up   | 3.574283816 |
| 3-Methylpentanoic acid                                  | 3.884604269 | 0.016753825 | down | 0.048936932 |
| xi-5-Acetyltetrahydro-<br>2(3H)-furanone                | 1.630248616 | 0.152346565 | down | 0.498894144 |
| D-(+)-Malic acid                                        | 1.6519845   | 0.258039768 | down | 0.471250323 |
| 2-Methylglutaric acid                                   | 1.650855285 | 0.176074647 | down | 0.467182877 |

|                                                                 |             |             |      |             |
|-----------------------------------------------------------------|-------------|-------------|------|-------------|
| 3-Methyladipic acid                                             | 3.358119904 | 0.007653456 | down | 0.103292896 |
| 4-(3-Pyridyl)-3-<br>5-butenic acid                              | 2.150233768 | 0.227393063 | down | 0.324186922 |
| 3-Hydroxycinnamic acid                                          | 2.070731747 | 0.222356823 | down | 0.310403774 |
| 3-Dehydroquinic acid                                            | 1.566199508 | 0.21412228  | down | 0.497688941 |
| 3-Hydroxysebacic acid                                           | 1.930062863 | 0.217092786 | down | 0.327182354 |
| 2,4-Dimethylpimelic acid                                        | 1.742661305 | 0.08559284  | down | 0.413693112 |
| Coriandrone C                                                   | 1.91973274  | 0.240455375 | down | 0.412353029 |
| Tetradecanedioic acid                                           | 1.773804402 | 0.263216346 | down | 0.492628459 |
| Enterolactone                                                   | 2.232922021 | 0.190290774 | down | 0.295790895 |
| 3b,8a-Dihydroxy-6b-angeloyloxy-7(11)-<br>eremophilin-12,8-olide | 1.728621917 | 0.290449979 | down | 0.266618069 |
| 3a,7a,12a-Trihydroxy-5b-cholestan-26-al                         | 1.771971418 | 0.298311873 | down | 0.396994715 |
| 4-Methyl-2-pentenal                                             | 3.449529364 | 0.020036483 | down | 0.088060896 |
